# Supplementary material for: New Formulation towards Healthier Meat Products: Juniperus communis L. Essential Oil as Alternative for Sodium Nitrite in Dry Fermented Sausages
Source: PubMed Central journal article supplement (PMC7466274; doi:10.3390/foods9081066), 2020-08-06
Supplement: foods-09-01066-s001.pdf [file foods-09-01066-s001.pdf]

Table S1. Proximate chemical composition of dry fermented sausages.

| FC (%) | moisture   | protein    | fat        | ash       |
|--------|------------|------------|------------|-----------|
| 15     | 32.17±0.56 | 28.66±0.20 | 32.18±1.19 | 5.72±0.11 |
| 25     | 33.27±1.62 | 23.14±0.40 | 36.29±0.97 | 5.35±0.43 |

FC – fat; Means ± Stdev;

Table S2. The effect of two-way, three-way and four-way interactions among processing parameters on the quality of dry fermented sausages expressed as p-value

| p           | pH      | <i>L</i> * | <i>a</i> * | <i>b</i> * | TBARS   | TPC   | LAB   | Hardness | Springiness | Cohesiveness | Chewiness | Color   | Odor    | Flavor  |
|-------------|---------|------------|------------|------------|---------|-------|-------|----------|-------------|--------------|-----------|---------|---------|---------|
| FC*NC       | 0.619   | 0.244      | 0.038      | 0.796      | 0.150   | 0.876 | 0.809 | 0.496    | 0.860       | 0.848        | 0.283     | 0.045   | 0.003   | 0.243   |
| FC*SD       | 0.059   | 0.009      | 0.491      | 0.005      | < 0.001 | 0.880 | 0.408 | < 0.001  | < 0.001     | < 0.001      | < 0.001   | < 0.001 | 0.622   | 0.305   |
| NC*SD       | 0.837   | 0.657      | 0.057      | 0.153      | < 0.001 | 0.176 | 0.039 | 0.135    | 0.013       | 0.297        | 0.029     | 0.031   | 0.145   | 0.790   |
| FC*JC       | 0.200   | 0.069      | 0.070      | 0.008      | 0.899   | 0.578 | 0.121 | 0.037    | 0.008       | < 0.001      | 0.094     | < 0.001 | 0.570   | 0.028   |
| NC*JC       | 0.992   | 0.819      | 0.880      | 0.020      | 0.996   | 0.956 | 0.326 | 0.854    | 0.770       | 0.048        | 0.761     | 0.125   | < 0.001 | < 0.001 |
| SD*JC       | < 0.001 | 0.546      | 0.090      | 0.010      | 0.833   | 0.456 | 0.215 | 0.589    | 0.336       | < 0.001      | 0.389     | < 0.001 | < 0.001 | < 0.001 |
| FC*NC*SD    | 0.005   | 0.626      | 0.003      | 0.001      | < 0.001 | 0.805 | 0.990 | 0.118    | < 0.001     | 0.645        | < 0.001   | < 0.001 | 0.719   | 0.841   |
| FC*NC*JC    | 0.759   | 0.824      | 0.352      | 0.442      | 0.998   | 0.596 | 0.965 | 0.458    | 0.776       | 0.172        | 0.939     | < 0.001 | < 0.001 | 0.012   |
| FC*SD*JC    | 0.001   | 0.167      | 0.030      | 0.395      | 0.002   | 0.656 | 0.658 | 0.002    | 0.006       | 0.142        | < 0.001   | < 0.001 | 0.096   | < 0.001 |
| NC*SD*JC    | 0.587   | 0.553      | 0.116      | 0.017      | 0.531   | 0.789 | 0.654 | 0.484    | 0.021       | 0.057        | 0.207     | 0.043   | 0.002   | < 0.001 |
| FC*NC*SD*JC | < 0.001 | 0.042      | 0.095      | < 0.001    | < 0.001 | 0.752 | 0.468 | < 0.001  | 0.009       | 0.002        | < 0.001   | < 0.001 | 0.529   | 0.013   |

FC – fat content; NC – nitrite content; SD – storage day; JC – JEO content.
